# Supplementary material for: Advantages of using 3D virtual reality based training in persons with Parkinson’s disease: a parallel study
Source: J Neuroeng Rehabil. 2019 Oct 17;16:119. doi: 10.1186/s12984-019-0601-1 (PMC6798369; doi:10.1186/s12984-019-0601-1)
Supplement: Supplementary file 1 — Additional file 1. Participants’ data [file 12984_2019_601_MOESM1_ESM.xlsx]

## Sheet: patients
	10cubes3D
	Case studies
	Participating subjects
	ID nr	patient	group (1/2)	gender	age	affected side	dominant hand	diagnosis	date of diagnosis	notes
	ID01		1	M	66	R	L	PB	2013
	ID02		1	F	57	R	L	PB	2012
	ID03		1	F	64	R	R	PB	2012
	ID04		1	M	66	R	R	PB	2016
	ID05		1	F	70	L	R	PB	2015
	ID06		1	F	82	L	R	PB	2010
	ID07		1	F	70	R	L	PB	2016
	ID08		1	F	79	L	R	PB	2012	OBDOBJE IZVAJANJA PROJEKTA: 30.8-12.9.2018
	ID09		1	M	77	R	R	PB	2008
	ID10		1	M	82	R	R	PB	2006
	3D01		2	F	67	R	R	PD	2009
	3D02		2	M	59	L	R	PD	2013
	3D03		2	M	60	R	R	PD	2010
	3D04		2	F	80	R	R	PD	2014
	3D05		2	F	76	R	R	PD	2015
	3D06		2	F	75	R	R	PD	2011
	3D07		2	M	70	R	R	PD	2008
	3D08		2	M	60	R	R	PD	2012
	3D09		2	F	68	R	R	PD	2010
	3D10		2	M	61	R	R	PD	2017
	mean				69.45				2011.95
	std				8.20711				2.99956
								Levene Test		Mean difference T-test
				LCD group		3D group		F	p	p
	gender	M		4		5		0.375	0.548	0.673
		F		6		5
	age			71.3		67.6		0.181	0.676	0.316
	affected side	R		7		9		5.684	0.028	0.288
		L		3		1
	dominant side	R		7		10
		L		3		0
	date			2012		2011		0.015	0.904	0.943

## Sheet: IMI
				PRE-GAME QUESTIONAIRRE				INTRINSIC MOTIVATION INVENTORY			S1					INTRINSIC MOTIVATION INVENTORY			S2					INTRINSIC MOTIVATION INVENTORY			S3					INTRINSIC MOTIVATION INVENTORY			S4					INTRINSIC MOTIVATION INVENTORY			S5					INTRINSIC MOTIVATION INVENTORY
	ID nr	patient	group (1/2)	Q5	Q6	Q7	Q1	Q2	Q3	Q4	Q5	Q6	Q7	Q8	Q1	Q2	Q3	Q4	Q5	Q6	Q7	Q8	Q1	Q2	Q3	Q4	Q5	Q6	Q7	Q8	Q1	Q2	Q3	Q4	Q5	Q6	Q7	Q8	Q1	Q2	Q3	Q4	Q5	Q6	Q7	Q8	Q1	Q2	Q3
	ID01		1	4	4	1	7	7	7	6	1	6	7	1	7	6	7	6	1	6	7	1	7	6	7	6	1	6	7	1	7	6	7	7	1	5	7	1	7	6	7	7	1	6	7	1	6	6	7
	ID02		1	1	4	1	7	7	7	7	7	5	7	7	7	1	7	7	7	1	7	7	7	7	7	7	6	6	7	6	7	4	7	7	6	4	7	6	7	5	7	7	7	5	7	7	7	5	7
	ID03		1	1	4	7	7	1	7	7	1	1	7	1	7	4	7	7	1	4	7	1	7	2	7	7	1	2	7	1	7	2	7	7	1	1	7	1	7	1	7	7	1	1	7	1	7	1	7
	ID04		1	1	5	3	7	5	6	7	5	6	7	5	7	5	6	7	6	5	6	1	7	5	7	7	5	6	7	1	7	6	6	7	5	6	6	1	7	6	6	7	5	6	7	1	7	6	7
	ID05		1	1	5	6	7	5	7	7	5	6	7	3	7	6	7	7	6	5	7	1	7	5	7	7	1	5	7	2	7	7	7	7	1	7	7	1	7	5	7	7	6	3	7	6	7	6	7
	ID06		1	1			7	5	7	7	7	5	5	1	7	5	7	7	1	5	6	1	7	4	6	7	3	4	4	4	7	4	5	7	2	4	7	2	7	6	6	7	2	6	6	2	7	3	7
	ID07		1	1			7	3	7	7	6	3	7	2	7	4	7	7	5	3	7	2	7	6	7	7	3	5	7	2	7	7	7	7	2	7	7	2	7	7	7	7	1	7	7	1	7	6	7
	ID08		1	1			7	5	7	7	7	4	7	2	7	4	7	7	5	2	7	4	7	3	7	7	6	3	5	4	7	2	7	7	5	2	6	1	7	1	7	7	6	1	5	1	7	1	7
	ID09		1	1			7	4	2	7	5	2	2	1	7	5	2	7	5	4	2	1	7	5	2	7	4	3	2	1	7	5	2	7	4	3	2	1	7	5	2	7	4	3	2	1	7	5	2
	ID10		1	1			7	6	7	7	4	3	7	4	7	7	7	7	4	4	7	1	7	6	7	7	4	2	7	1	7	5	7	7	5	2	7	1	7	6	7	7	5	3	7	1	7	7	7
	3D01		2	1	3	1	7	6	7	7	5	7	7	1	7	7	7	7	6	7	7	4	7	5	7	7	5	6	7	4	2	2	2	2	1	1	1	1	5	5	7	5	4	5	5	4	5	5	7
	3D02		2	1	3	1	6	5	7	6	4	6	6	2	6	6	7	6	1	5	7	1	5	4	7	6	3	3	6	2	6	6	7	6	1	6	7	1	6	6	7	6	1	6	7	1	6	6	7
	3D03		2	2	4	4	4	5	7	6	4	3	7	3	7	7	7	7	6	7	7	1	7	6	7	7	4	7	7	1	7	7	7	7	1	7	7	1	7	7	7	7	1	7	7	1	7	7	7
	3D04		2	1	5	5	6	1	4	7	6	2	4	1	6	4	5	7	5	5	6	2	7	3	6	7	5	3	6	3	5	2	6	6	6	1	5	5	7	6	4	7	6	6	6	3	6	6	5
	3D05		2	1	2	3	4	2	7	7	4	4	5	1	7	5	7	7	4	7	6	1	7	4	7	6	6	4	7	6	7	7	7	6	3	6	7	4	7	3	7	7	4	4	6	4	7	5	7
	3D06		2	1	5	5	7	6	7	7	5	6	7	3	7	6	7	7	4	6	7	4	7	6	7	7	5	6	7	3	7	5	7	7	4	4	7	4	6	4	7	7	5	5	7	5	7	6	7
	3D07		2	1	5	6	7	6	7	7	6	6	6	3	7	3	6	7	6	4	6	3	7	5	7	7	6	4	5	4	7	3	7	7	5	4	6	5	7	5	6	7	6	7	5	6	7	5	7
	3D08		2	1	4	4	4	4	7	7	7	7	7	7	4	4	6	7	4	6	6	3	7	7	6	6	5	7	7	5	6	6	7	7	5	7	7	6	6	7	7	7	2	7	7	2	7	7	7
	3D09		2	1	3	5	6	4	6	6	5	7	7	4	6	6	7	6	4	6	7	5	7	6	7	7	3	7	7	5	6	6	7	6	3	6	7	4	6	5	7	6	4	5	6	6	7	6	7
	3D10		2	1	4	1	5	5	7	5	4	7	7	1	5	5	7	6	2	5	7	1	5	5	6	6	2	4	6	1	5	5	6	6	2	6	6	1	5	6	6	6	1	6	6	1	5	5	6
[truncated: 37 more columns]

## Sheet: clinical_tests
		10cubes3D
		small scale RCT
		Clinical tests output
					Box &Blocks																	MDS-UPDRS, III. MOTOR EXAMINATION
	affected side	ID	group (1/2)	assessment nr.	left /non-affected side	Right / affected side	Speech	Facial Expression	Rigitity of neck	Rigidity of upper right extr.	Rigidity of upper left extr.	Rigidity of lower right extr.	Rigidity of lower left extr.	Finger taps right	Finger taps left	Hand movements	Hand movements	Pronation /Supination	Pronation /Supination	Toe tapping	Toe tapping	Leg agility	Leg agility	Arising from chair	Gait	Freezing of gait	Postural stability	Posture	Body bradykinesia	Postural tremor of hands	Postural tremor of hands	Kinetic tremor of hands	Kinetic tremor of hands	Rest tremor amplitude - upper right	Rest tremor amplitude - upper left	Rest tremor amplitude - lower right	Rest tremor amplitude - lower left	Rest tremor amplitude - face, lips, chicks	Constancy of rest tremor	Number of points / total
							1	2	3	3 UR	3 UL	3 LR	3 LL	4 R	4 L	5 R	5 L	6 R	6 L	7 R	7 L	8 R	8 L	9	10	11	12	13	14	15 R	15 L	16 R	16 L	17 R	17 L	17 R	17 L	17	18	132
	R	ID01	A	1	53	47	2	2	3	2	2	2	2	3	2	3	2	3	2	3	2	3	2	1	2	2	3	1	2	0	0	0	0	0	0	0	0	0	0	51
			A	2	43	42	2	2	2	2	2	2	1	2	1	2	1	2	1	2	1	2	1	1	2	2	3	1	2	0	0	0	0	0	0	0	0	0	0	39
	R	ID02	A	1	45	53	2	3	1	1	2	1	2	1	1	1	2	2	2	2	3	0	1	0	1	0	0	1	2	1	2	1	1	1	2	0	0	0	1	40
			A	2	48	47	2	3	1	1	2	1	2	1	1	1	1	2	2	2	3	0	0	0	1	0	0	1	2	1	1	1	1	1	1	0	0	0	1	36
	R	ID03	A	1	47	41	1	1	2	3	2	3	2	3	2	3	2	3	2	3	2	3	2	1	2	1	2	1	1	1	0	1	0	1	0	0	0	0	2	52
			A	2	57	51	1	1	2	3	1	2	1	3	1	3	1	3	2	3	2	2	1	1	2	1	1	1	1	1	0	1	0	1	0	0	0	0	2	44
	R	ID04	A	1	48	49	1	1	1	2	0	2	0	3	2	3	2	3	2	1	0	1	0	0	0	0	0	0	0	0	0	1	0	1	0	0	0	0	1	27
			A	2	50	51	1	1	1	1	0	1	0	2	1	1	0	1	0	1	0	1	0	0	0	0	0	0	0	0	0	1	0	1	0	0	0	0	1	15
	L	ID05	A	1	55	52	0	0	0	1	0	0	0	2	1	1	1	1	1	1	1	0	0	1	1	0	1	0	1	1	0	1	0	0	0	0	0	0	0	16
			A	2	59	60	0	0	0	1	0	0	0	2	1	1	1	1	1	1	1	0	0	1	1	0	1	0	1	1	0	1	0	0	0	0	0	0	0	16
	L	ID06	A	1	50	38	0	0	1	2	1	2	1	1	1	1	0	1	0	1	0	1	0	1	2	0	1	1	1	1	0	1	0	0	0	0	0	0	0	21
			A	2	53	44	0	0	1	2	1	2	1	1	1	1	0	1	0	1	0	1	0	1	2	0	1	1	1	1	0	1	0	0	0	0	0	0	0	21
	R	ID07	A	1	44	54	0	0	0	0	0	0	0	0	1	0	1	0	0	0	1	0	0	1	1	0	3	2	2	0	2	0	0	0	1	0	1	0	4	20
			A	2	47	54	0	0	0	0	0	0	0	0	1	0	1	0	0	0	1	0	0	1	1	0	3	2	2	0	2	0	0	0	1	0	1	0	4	20
	L	ID08	A	1	38	41	1	0	1	0	0	0	0	0	0	1	0	1	0	1	0	1	1	0	0	0	0	2	2	2	0	0	0	2	0	0	0	1	4	23
			A	2	41	48	1	0	1	0	0	0	0	0	0	1	0	1	0	1	0	1	1	0	0	0	0	2	2	2	0	0	0	2	0	0	0	1	4	23
		ID09	A	1	47	44	1	1	1	1	1	1	1	0	0	0	0	1	0	1	2	1	2	1	2	1	3	2	2	1	2	0	0	0	0	0	0	1	1	30
			A	2		52	1	1	1	1	1	1	1	0	0	0	0	0	0	1	2	1	2	1	2	1	3	2	2	1	2	0	0	0	0	0	0	1	1	29
		ID10	A	1	40	44	2	2	2	0	0	0	0	0	1	1	1	1	1	1	1	0	0	0	0	3	4	3	2	3	0	0	1	1	2	2	1	1	0	38
			A	2	43	47	2	2	2	0	0	0	0	0	1	1	1	1	1	1	1	0	0	0	0	3	4	3	2	3	0	0	1	1	2	2	1	1	0	38
	R	3D01	B	1	62	64	1	0	1	1	2	1	1	1	2	1	2	1	2	1	2	1	2	0	1	0	1	1	0	0	0	0	0	0	0	0	0	0	0	25
			B	2	62	62	1	0	1	1	2	1	1	1	2	1	2	1	2	1	2	1	2	0	1	0	1	1	0	0	0	0	0	0	0	0	0	0	0	25
	L	3D02	B	1	53	35	2	1	1	0	1	0	0	1	2	0	0	0	1	1	2	0	0	0	0	0	0	2	1	0	1	0	1	0	1	0	0	0	2	20
			B	2	52	32	2	1	1	0	1	0	0	0	1	0	0	0	1	0	0	0	0	0	0	0	0	2	1	0	0	0	0	0	1	0	0	0	1	12
	R	3D03	B	1	58	56	0	1	3	1	1	1	1	2	1	2	1	2	1	1	1	0	0	0	1	0	0	1	1	0	0	1	0	0	0	0	0	0	0	23
			B	2	60	54	0	1	2	1	1	1	1	2	1	1	1	2	1	1	1	0	0	0	1	0	0	1	1	0	0	0	0	0	0	0	0	0	0	21
	R	3D04	B	1	54	59	1	0	0	1	0	1	0	1	0	1	0	1	0	1	0	1	0	1	0	0	2	0	0	1	0	1	0	1	0	0	0	0	1	14
			B	2	58	63	1	0	0	0	0	0	0	0	0	0	0	0	0	0	0	0	0	0	0	1	0	1	1	0	1	0	1	0	1	0	0	0	1	8
	R	3D05	B	1	43	42	0	0	0	1	0	0	0	0	1	0	1	0	1	0	1	0	1	0	1	0	0	2	2	1	1	1	1	1	1	0	0	1	2	20
			B	2	43	45	0	0	0	1	0	0	0	0	0	0	1	0	1	0	0	0	1	0	1	0	0	2	2	1	1	1	1	1	1	0	0	1	2	18
	R	3D06	B	1	53	53	0	0	1	0	0	1	1	1	0	1	0	1	0	0	0	0	0	1	3	0	3	2	2	0	0	0	0	0	0	0	0	0	0	17
			B	2	54	55	0	0	1	0	0	1	1	1	0	1	0	1	0	0	0	0	0	1	3	0	3	2	2	0	0	0	0	0	0	0	0	0	0	17
	R	3D07	B	1	47	47	0	1	2	0	0	0	0	0	0	0	0	0	0	1	0	0	0	1	2	3	3	2	2	0	1	0	0	0	1	0	0	0	1	20
			B	2	52	48	0	1	2	0	0	0	0	0	0	0	0	0	0	1	0	0	0	1	2	3	3	2	2	0	1	0	0	0	1	0	0	0	1	20
	R	3D08	B	1	45	41	2	2	2	2	2	2	2	0	0	1	0	1	2	1	0	1	0	1	1	0	0	1	2	1	1	0	0	0	0	0	0	0	0	26
			B	2	43	38	2	2	2	2	2	2	2	0	0	1	0	1	2	1	0	1	0	1	1	0	0	1	2	1	1	0	0	0	0	0	0	0	0	26
	R	3D09	B	1	37	38	1	1	1	1	2	2	1	1	2	1	2	0	1	1	4	1	2	1	2	0	3	2	2	0	0	0	0	0	0	0	0	0	0	34
			B	2	47	42	1	1	1	1	2	2	1	1	2	1	2	0	1	1	4	1	2	1	2	0	3	2	2	0	0	0	0	0	0	0	0	0	0	34
	R	3D10	B	1	47	50	2	2	1	0	0	0	0	0	1	0	0	0	0	0	0	0	0	0	0	0	0	0	1	0	0	0	0	0	0	0	0	0	0	6
			B	2	57	62	2	2	1	0	0	0	0	0	1	0	0	0	0	0	0	0	0	0	0	0	0	0	1	0	0	0	0	0	0	0	0	0	0	6

## Sheet: results_CUBES
	10cubes3D
	Case studies
	therapist
	game		10 cubes
	Results of the game
									number of collected boxes / remaining time
	patient	ID nr	date	measurement nr. / days	1		2		3		4		5		mean	std	remaining time / s	std		notes
	PA	ID01		1	5	0	2	0	4	0	6	0	4	0	4.2	1.48324	0	0
				2	7	0	5	0	6	0	8	0	4	0	6	1.58114	0	0
				3	8	0	6	0	7	0	9	0	9	0	7.8	1.30384	0	0
				4	7	0	7	0	9	0	6	0	7	0	7.2	1.09545	0	0
				5	4	0	9	0	4	0	7	0	6	0	6	2.12132	0	0
				6	10	1	10	29	9	0	10	30	10	51	9.8	0.447214	22.2	21.6726
				7	6	0	8	0	10	23	7	0	9	0	8	1.58114	4.6	10.2859
				8	5	0	5	0	8	0	10	44	9	0	7.4	2.30217	8.8	19.6774
				9	10	2	9	0	8	0	9	0	5	0	8.2	1.92354	0.4	0.894427
				10	8	0	8	0	10	32	9	0	6	0	8.2	1.48324	6.4	14.3108
				1											#DIV/0!	#DIV/0!	#DIV/0!	#DIV/0!
				2											#DIV/0!	#DIV/0!	#DIV/0!	#DIV/0!
				3											#DIV/0!	#DIV/0!	#DIV/0!	#DIV/0!
				4											#DIV/0!	#DIV/0!	#DIV/0!	#DIV/0!
				5											#DIV/0!	#DIV/0!	#DIV/0!	#DIV/0!
				6											#DIV/0!	#DIV/0!	#DIV/0!	#DIV/0!
				7											#DIV/0!	#DIV/0!	#DIV/0!	#DIV/0!
				8											#DIV/0!	#DIV/0!	#DIV/0!	#DIV/0!
				9											#DIV/0!	#DIV/0!	#DIV/0!	#DIV/0!
				10											#DIV/0!	#DIV/0!	#DIV/0!	#DIV/0!
				1											#DIV/0!	#DIV/0!	#DIV/0!	#DIV/0!
				2											#DIV/0!	#DIV/0!	#DIV/0!	#DIV/0!
				3											#DIV/0!	#DIV/0!	#DIV/0!	#DIV/0!
				4											#DIV/0!	#DIV/0!	#DIV/0!	#DIV/0!
				5											#DIV/0!	#DIV/0!	#DIV/0!	#DIV/0!
				6											#DIV/0!	#DIV/0!	#DIV/0!	#DIV/0!
				7											#DIV/0!	#DIV/0!	#DIV/0!	#DIV/0!
				8											#DIV/0!	#DIV/0!	#DIV/0!	#DIV/0!
				9											#DIV/0!	#DIV/0!	#DIV/0!	#DIV/0!
				10											#DIV/0!	#DIV/0!	#DIV/0!	#DIV/0!
				1											#DIV/0!	#DIV/0!	#DIV/0!	#DIV/0!
				2											#DIV/0!	#DIV/0!	#DIV/0!	#DIV/0!
				3											#DIV/0!	#DIV/0!	#DIV/0!	#DIV/0!
				4											#DIV/0!	#DIV/0!	#DIV/0!	#DIV/0!
				5											#DIV/0!	#DIV/0!	#DIV/0!	#DIV/0!
				6											#DIV/0!	#DIV/0!	#DIV/0!	#DIV/0!
				7											#DIV/0!	#DIV/0!	#DIV/0!	#DIV/0!
				8											#DIV/0!	#DIV/0!	#DIV/0!	#DIV/0!
				9											#DIV/0!	#DIV/0!	#DIV/0!	#DIV/0!
				10											#DIV/0!	#DIV/0!	#DIV/0!	#DIV/0!	#DIV/0!
				1											#DIV/0!	#DIV/0!	#DIV/0!	#DIV/0!
				2											#DIV/0!	#DIV/0!	#DIV/0!	#DIV/0!
				3											#DIV/0!	#DIV/0!	#DIV/0!	#DIV/0!
				4											#DIV/0!	#DIV/0!	#DIV/0!	#DIV/0!
				5											#DIV/0!	#DIV/0!	#DIV/0!	#DIV/0!
				6											#DIV/0!	#DIV/0!	#DIV/0!	#DIV/0!
				7											#DIV/0!	#DIV/0!	#DIV/0!	#DIV/0!
				8											#DIV/0!	#DIV/0!	#DIV/0!	#DIV/0!
				9											#DIV/0!	#DIV/0!	#DIV/0!	#DIV/0!
				10											#DIV/0!	#DIV/0!	#DIV/0!	#DIV/0!	#DIV/0!
				1											#DIV/0!	#DIV/0!	#DIV/0!	#DIV/0!
				2											#DIV/0!	#DIV/0!	#DIV/0!	#DIV/0!
				3											#DIV/0!	#DIV/0!	#DIV/0!	#DIV/0!
				4											#DIV/0!	#DIV/0!	#DIV/0!	#DIV/0!
				5											#DIV/0!	#DIV/0!	#DIV/0!	#DIV/0!
				6											#DIV/0!	#DIV/0!	#DIV/0!	#DIV/0!
				7											#DIV/0!	#DIV/0!	#DIV/0!	#DIV/0!
				8											#DIV/0!	#DIV/0!	#DIV/0!	#DIV/0!
				9											#DIV/0!	#DIV/0!	#DIV/0!	#DIV/0!
				10											#DIV/0!	#DIV/0!	#DIV/0!	#DIV/0!	#DIV/0!
				1											#DIV/0!	#DIV/0!	#DIV/0!	#DIV/0!
				2											#DIV/0!	#DIV/0!	#DIV/0!	#DIV/0!
				3											#DIV/0!	#DIV/0!	#DIV/0!	#DIV/0!
				4											#DIV/0!	#DIV/0!	#DIV/0!	#DIV/0!
				5											#DIV/0!	#DIV/0!	#DIV/0!	#DIV/0!
				6											#DIV/0!	#DIV/0!	#DIV/0!	#DIV/0!
				7											#DIV/0!	#DIV/0!	#DIV/0!	#DIV/0!
				8											#DIV/0!	#DIV/0!	#DIV/0!	#DIV/0!
				9											#DIV/0!	#DIV/0!	#DIV/0!	#DIV/0!
				10											#DIV/0!	#DIV/0!	#DIV/0!	#DIV/0!	#DIV/0!
				1											#DIV/0!	#DIV/0!	#DIV/0!	#DIV/0!
				2											#DIV/0!	#DIV/0!	#DIV/0!	#DIV/0!
				3											#DIV/0!	#DIV/0!	#DIV/0!	#DIV/0!
				4											#DIV/0!	#DIV/0!	#DIV/0!	#DIV/0!
				5											#DIV/0!	#DIV/0!	#DIV/0!	#DIV/0!
				6											#DIV/0!	#DIV/0!	#DIV/0!	#DIV/0!
				7											#DIV/0!	#DIV/0!	#DIV/0!	#DIV/0!
				8											#DIV/0!	#DIV/0!	#DIV/0!	#DIV/0!
				9											#DIV/0!	#DIV/0!	#DIV/0!	#DIV/0!
				10											#DIV/0!	#DIV/0!	#DIV/0!	#DIV/0!	#DIV/0!
				1											#DIV/0!	#DIV/0!	#DIV/0!	#DIV/0!
				2											#DIV/0!	#DIV/0!	#DIV/0!	#DIV/0!
				3											#DIV/0!	#DIV/0!	#DIV/0!	#DIV/0!
				4											#DIV/0!	#DIV/0!	#DIV/0!	#DIV/0!
				5											#DIV/0!	#DIV/0!	#DIV/0!	#DIV/0!
				6											#DIV/0!	#DIV/0!	#DIV/0!	#DIV/0!
				7											#DIV/0!	#DIV/0!	#DIV/0!	#DIV/0!
				8											#DIV/0!	#DIV/0!	#DIV/0!	#DIV/0!
				9											#DIV/0!	#DIV/0!	#DIV/0!	#DIV/0!
				10											#DIV/0!	#DIV/0!	#DIV/0!	#DIV/0!	#DIV/0!
				1											#DIV/0!	#DIV/0!	#DIV/0!	#DIV/0!
				2											#DIV/0!	#DIV/0!	#DIV/0!	#DIV/0!
				3											#DIV/0!	#DIV/0!	#DIV/0!	#DIV/0!
				4											#DIV/0!	#DIV/0!	#DIV/0!	#DIV/0!
				5											#DIV/0!	#DIV/0!	#DIV/0!	#DIV/0!
				6											#DIV/0!	#DIV/0!	#DIV/0!	#DIV/0!
				7											#DIV/0!	#DIV/0!	#DIV/0!	#DIV/0!
				8											#DIV/0!	#DIV/0!	#DIV/0!	#DIV/0!
				9											#DIV/0!	#DIV/0!	#DIV/0!	#DIV/0!
				10											#DIV/0!	#DIV/0!	#DIV/0!	#DIV/0!	#DIV/0!
		3D01		1											#DIV/0!	#DIV/0!	#DIV/0!	#DIV/0!
				2											#DIV/0!	#DIV/0!	#DIV/0!	#DIV/0!
				3											#DIV/0!	#DIV/0!	#DIV/0!	#DIV/0!
				4											#DIV/0!	#DIV/0!	#DIV/0!	#DIV/0!
				5											#DIV/0!	#DIV/0!	#DIV/0!	#DIV/0!
				6											#DIV/0!	#DIV/0!	#DIV/0!	#DIV/0!
				7											#DIV/0!	#DIV/0!	#DIV/0!	#DIV/0!
				8											#DIV/0!	#DIV/0!	#DIV/0!	#DIV/0!
				9											#DIV/0!	#DIV/0!	#DIV/0!	#DIV/0!
				10											#DIV/0!	#DIV/0!	#DIV/0!	#DIV/0!	#DIV/0!
				1											#DIV/0!	#DIV/0!	#DIV/0!	#DIV/0!
				2											#DIV/0!	#DIV/0!	#DIV/0!	#DIV/0!
				3											#DIV/0!	#DIV/0!	#DIV/0!	#DIV/0!
				4											#DIV/0!	#DIV/0!	#DIV/0!	#DIV/0!
				5											#DIV/0!	#DIV/0!	#DIV/0!	#DIV/0!
				6											#DIV/0!	#DIV/0!	#DIV/0!	#DIV/0!
				7											#DIV/0!	#DIV/0!	#DIV/0!	#DIV/0!
				8											#DIV/0!	#DIV/0!	#DIV/0!	#DIV/0!
				9											#DIV/0!	#DIV/0!	#DIV/0!	#DIV/0!
				10											#DIV/0!	#DIV/0!	#DIV/0!	#DIV/0!	#DIV/0!
				1											#DIV/0!	#DIV/0!	#DIV/0!	#DIV/0!
				2											#DIV/0!	#DIV/0!	#DIV/0!	#DIV/0!
				3											#DIV/0!	#DIV/0!	#DIV/0!	#DIV/0!
				4											#DIV/0!	#DIV/0!	#DIV/0!	#DIV/0!
				5											#DIV/0!	#DIV/0!	#DIV/0!	#DIV/0!
				6											#DIV/0!	#DIV/0!	#DIV/0!	#DIV/0!
				7											#DIV/0!	#DIV/0!	#DIV/0!	#DIV/0!
				8											#DIV/0!	#DIV/0!	#DIV/0!	#DIV/0!
				9											#DIV/0!	#DIV/0!	#DIV/0!	#DIV/0!
				10											#DIV/0!	#DIV/0!	#DIV/0!	#DIV/0!	#DIV/0!
				1											#DIV/0!	#DIV/0!	#DIV/0!	#DIV/0!
				2											#DIV/0!	#DIV/0!	#DIV/0!	#DIV/0!
				3											#DIV/0!	#DIV/0!	#DIV/0!	#DIV/0!
				4											#DIV/0!	#DIV/0!	#DIV/0!	#DIV/0!
				5											#DIV/0!	#DIV/0!	#DIV/0!	#DIV/0!
				6											#DIV/0!	#DIV/0!	#DIV/0!	#DIV/0!
				7											#DIV/0!	#DIV/0!	#DIV/0!	#DIV/0!
				8											#DIV/0!	#DIV/0!	#DIV/0!	#DIV/0!
				9											#DIV/0!	#DIV/0!	#DIV/0!	#DIV/0!
				10											#DIV/0!	#DIV/0!	#DIV/0!	#DIV/0!	#DIV/0!
				1											#DIV/0!	#DIV/0!	#DIV/0!	#DIV/0!
				2											#DIV/0!	#DIV/0!	#DIV/0!	#DIV/0!
				3											#DIV/0!	#DIV/0!	#DIV/0!	#DIV/0!
				4											#DIV/0!	#DIV/0!	#DIV/0!	#DIV/0!
				5											#DIV/0!	#DIV/0!	#DIV/0!	#DIV/0!
				6											#DIV/0!	#DIV/0!	#DIV/0!	#DIV/0!
				7											#DIV/0!	#DIV/0!	#DIV/0!	#DIV/0!
				8											#DIV/0!	#DIV/0!	#DIV/0!	#DIV/0!
				9											#DIV/0!	#DIV/0!	#DIV/0!	#DIV/0!
				10											#DIV/0!	#DIV/0!	#DIV/0!	#DIV/0!	#DIV/0!
				1											#DIV/0!	#DIV/0!	#DIV/0!	#DIV/0!
				2											#DIV/0!	#DIV/0!	#DIV/0!	#DIV/0!
				3											#DIV/0!	#DIV/0!	#DIV/0!	#DIV/0!
				4											#DIV/0!	#DIV/0!	#DIV/0!	#DIV/0!
				5											#DIV/0!	#DIV/0!	#DIV/0!	#DIV/0!
				6											#DIV/0!	#DIV/0!	#DIV/0!	#DIV/0!
				7											#DIV/0!	#DIV/0!	#DIV/0!	#DIV/0!
				8											#DIV/0!	#DIV/0!	#DIV/0!	#DIV/0!
				9											#DIV/0!	#DIV/0!	#DIV/0!	#DIV/0!
				10											#DIV/0!	#DIV/0!	#DIV/0!	#DIV/0!	#DIV/0!
				1											#DIV/0!	#DIV/0!	#DIV/0!	#DIV/0!
				2											#DIV/0!	#DIV/0!	#DIV/0!	#DIV/0!
				3											#DIV/0!	#DIV/0!	#DIV/0!	#DIV/0!
				4											#DIV/0!	#DIV/0!	#DIV/0!	#DIV/0!
				5											#DIV/0!	#DIV/0!	#DIV/0!	#DIV/0!
				6											#DIV/0!	#DIV/0!	#DIV/0!	#DIV/0!
				7											#DIV/0!	#DIV/0!	#DIV/0!	#DIV/0!
				8											#DIV/0!	#DIV/0!	#DIV/0!	#DIV/0!
				9											#DIV/0!	#DIV/0!	#DIV/0!	#DIV/0!
				10											#DIV/0!	#DIV/0!	#DIV/0!	#DIV/0!	#DIV/0!
				1											#DIV/0!	#DIV/0!	#DIV/0!	#DIV/0!
				2											#DIV/0!	#DIV/0!	#DIV/0!	#DIV/0!
				3											#DIV/0!	#DIV/0!	#DIV/0!	#DIV/0!
				4											#DIV/0!	#DIV/0!	#DIV/0!	#DIV/0!
				5											#DIV/0!	#DIV/0!	#DIV/0!	#DIV/0!
				6											#DIV/0!	#DIV/0!	#DIV/0!	#DIV/0!
				7											#DIV/0!	#DIV/0!	#DIV/0!	#DIV/0!
				8											#DIV/0!	#DIV/0!	#DIV/0!	#DIV/0!
				9											#DIV/0!	#DIV/0!	#DIV/0!	#DIV/0!
				10											#DIV/0!	#DIV/0!	#DIV/0!	#DIV/0!
				1											#DIV/0!	#DIV/0!	#DIV/0!	#DIV/0!
				2											#DIV/0!	#DIV/0!	#DIV/0!	#DIV/0!
				3											#DIV/0!	#DIV/0!	#DIV/0!	#DIV/0!
				4											#DIV/0!	#DIV/0!	#DIV/0!	#DIV/0!
				5											#DIV/0!	#DIV/0!	#DIV/0!	#DIV/0!
				6											#DIV/0!	#DIV/0!	#DIV/0!	#DIV/0!
				7											#DIV/0!	#DIV/0!	#DIV/0!	#DIV/0!
				8											#DIV/0!	#DIV/0!	#DIV/0!	#DIV/0!
				9											#DIV/0!	#DIV/0!	#DIV/0!	#DIV/0!
				10											#DIV/0!	#DIV/0!	#DIV/0!	#DIV/0!
		3D10		1											#DIV/0!	#DIV/0!	#DIV/0!	#DIV/0!
				2											#DIV/0!	#DIV/0!	#DIV/0!	#DIV/0!
				3											#DIV/0!	#DIV/0!	#DIV/0!	#DIV/0!
				4											#DIV/0!	#DIV/0!	#DIV/0!	#DIV/0!
				5											#DIV/0!	#DIV/0!	#DIV/0!	#DIV/0!
				6											#DIV/0!	#DIV/0!	#DIV/0!	#DIV/0!
				7											#DIV/0!	#DIV/0!	#DIV/0!	#DIV/0!
				8											#DIV/0!	#DIV/0!	#DIV/0!	#DIV/0!
				9											#DIV/0!	#DIV/0!	#DIV/0!	#DIV/0!
				10											#DIV/0!	#DIV/0!	#DIV/0!	#DIV/0!
	POPULATION														mean	std	remain time
				1											#DIV/0!	#DIV/0!	#DIV/0!	#DIV/0!
				2											#DIV/0!	#DIV/0!	#DIV/0!	#DIV/0!
				3											#DIV/0!	#DIV/0!	#DIV/0!	#DIV/0!
				4											#DIV/0!	#DIV/0!	#DIV/0!	#DIV/0!
				5											#DIV/0!	#DIV/0!	#DIV/0!	#DIV/0!
				6											#DIV/0!	#DIV/0!	#DIV/0!	#DIV/0!
				7											#DIV/0!	#DIV/0!	#DIV/0!	#DIV/0!
				8											#DIV/0!	#DIV/0!	#DIV/0!	#DIV/0!
				9											#DIV/0!	#DIV/0!	#DIV/0!	#DIV/0!
				10											#DIV/0!	#DIV/0!	#DIV/0!	#DIV/0!

## Sheet: Analyses
	CLINICAL TESTS		before		after							SD
	LCD group		mean	SD	mean	SD		UPDRSIII		before	after	before	after			affected side	ID	group (A/B)	assessment nr.	Hand movements	Hand movements	Pronation /Supination	Pronation /Supination	Postural tremor of hands	Postural tremor of hands	Kinetic tremor of hands	Kinetic tremor of hands	TOTAL Score for hands		assessment nr.	TOTAL Score for hands					group (A/B)	TOTAL Score for hands
	Box& Blocks	AF	46.3	5.29245	49.6	4.92341			LCD group	31.8	28.1	12.2131	9.96444							5 R	5 L	6 R	6 L	15 R	15 L	16 R	16 L	Tscore			A	B					Trial 1	Trial 2
		NON-AF	46.7	5.02096	49	5.98145			3D group	20.5	18.7	7.10282	8.11234			R	ID01	A	1	3	2	3	2	0	0	0	0	10		Trial 1	10	6				A	10	6
	UPDRSIII		31.8	12.2131	28.1	9.96444												A	2	2	1	2	1	0	0	0	0	6			12	3				A	12	10
												SD				R	ID02	A	1	1	2	2	2	1	2	1	1	12			12	7				A	12	11
	3D group							Box& Blocks		before	after	before	after					A	2	1	1	2	2	1	1	1	1	10			11	4				A	11	3
	Box& Blocks	AF	48.5	9.06918	50.1	10.2903		LCD group	AF	46.3	49.6	5.5	5.87			R	ID03	A	1	3	2	3	2	1	0	1	0	12			6	6				A	6	6
		NON-AF	49.9	7.09154	52.8	6.4			NON-AF	46.7	49	3.45	5.41					A	2	3	1	3	2	1	0	1	0	11			4	2				A	4	4
	UPDRSIII		20.5	7.10282	18.7	8.11234		3D group	AF	48.5	50.1	9.37	9.97			R	ID04	A	1	3	2	3	2	0	0	1	0	11			3	1				A	3	3
									NON-AF	49.9	52.8	5.89	5.9					A	2	1	0	1	0	0	0	1	0	3			4	6				A	4	4
																L	ID05	A	1	1	1	1	1	1	0	1	0	6			4	4				A	0	0
																		A	2	1	1	1	1	1	0	1	0	6			8	0				A	0	0
																L	ID06	A	1	1	0	1	0	1	0	1	0	4		Trial 2	6	6				B	6	6
																		A	2	1	0	1	0	1	0	1	0	4			10	1				B	3	1
																R	ID07	A	1	0	1	0	0	0	2	0	0	3			11	5				B	7	5
																		A	2	0	1	0	0	0	2	0	0	3			3	2				B	4	2
																L	ID08	A	1	1	0	1	0	2	0	0	0	4			6	6				B	6	6
																		A	2	1	0	1	0	2	0	0	0	4			4	2				B	2	2
																	ID09	A	1	0	0	1	0	1	2	0	0	4			3	1				B	1	1
																		A	2	0	0	0	0	1	2	0	0	3			4	6				B	6	6
																	ID10	A	1	1	1	1	1	3	0	0	1	8			3	4				B	0	0
																		A	2	1	1	1	1	3	0	0	1	8			8	0				B	0	0
																R	3D01	B	1	1	2	1	2	0	0	0	0	6
																		B	2	1	2	1	2	0	0	0	0	6
																L	3D02	B	1	0	0	0	1	0	1	0	1	3
																		B	2	0	0	0	1	0	0	0	0	1
																R	3D03	B	1	2	1	2	1	0	0	1	0	7
																		B	2	1	1	2	1	0	0	0	0	5													SD
																R	3D04	B	1	1	0	1	0	1	0	1	0	4									UPDRSIII hand only		before	after	before	after
																		B	2	0	0	0	0	0	1	0	1	2									A	LCD group	7.4	5.8	3.44093	2.82135
																R	3D05	B	1	0	1	0	1	1	1	1	1	6									B	3D group	3.9	3.3	2.2561	2.2383
																		B	2	0	1	0	1	1	1	1	1	6
																R	3D06	B	1	1	0	1	0	0	0	0	0	2
																		B	2	1	0	1	0	0	0	0	0	2
																R	3D07	B	1	0	0	0	0	0	1	0	0	1
																		B	2	0	0	0	0	0	1	0	0	1
																R	3D08	B	1	1	0	1	2	1	1	0	0	6
																		B	2	1	0	1	2	1	1	0	0	6
																R	3D09	B	1	1	2	0	1	0	0	0	0	4
																		B	2	1	2	0	1	0	0	0	0	4
																R	3D10	B	1	0	0	0	0	0	0	0	0	0
																		B	2	0	0	0	0	0	0	0	0	0

## Sheet: Notes
	INTRINSIC MOTIVATION INVENTORY
	Q1	Zelo sem se potrudil pri igranju igre							Interest/enjoyment:
	Q2	Mislim, da mi gre igra kar dobro od rok. 1							Q3	Q7
	Q3	Igra se mi je zdela zelo zanimiva.							Effort/importance:
	Q4	Potrudil sem se po svojih najboljših močeh.							Q1	Q4
	Q5	Med igranjem sem bil zelo napet.							Perceived competence:
	Q6	Zadovoljen sem s svojim rezultatom.							Q2	Q6
	Q7	Igranje je bilo zabavno.							Pressure/tension:
	Q8	Med igro sem bil pod pritiskom.							Q5	Q8
